# Supplementary material for: Active Transport to School May Reduce Psychosomatic Symptoms in School-Aged Children: Data from Nine Countries
Source: PubMed Central journal article supplement (PMC7727647; doi:10.3390/ijerph17238709), 2020-11-24
Supplement: ijerph-17-08709-s001.pdf [file ijerph-17-08709-s001.pdf]

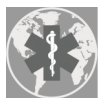

## Supplementary Material

**Table S1.** Level of subjective complaints by mode of transport to school.

| Country<br>/WHO region                        | Passive mode |      | Walking |      | Biking |      | P*     |
|-----------------------------------------------|--------------|------|---------|------|--------|------|--------|
|                                               | Mean         | SD   | Mean    | SD   | Mean   | SD   |        |
| Total index of psychosomatic symptoms (SCL_T) |              |      |         |      |        |      |        |
| Azerbaijan                                    | 6.88         | 7.32 | 5.36    | 6.68 | 6.89   | 8.81 | <0.001 |
| Czechia                                       | 8.55         | 5.88 | 8.24    | 5.80 | 7.40   | 5.26 | 0.001  |
| Denmark                                       | 8.00         | 6.06 | 8.49    | 6.38 | 7.14   | 5.49 | <0.001 |
| Germany                                       | 8.41         | 6.02 | 8.51    | 6.07 | 7.41   | 5.40 | <0.001 |
| Ireland                                       | 8.13         | 6.49 | 8.96    | 6.84 | 7.11   | 5.58 | 0.001  |
| Norway                                        | 8.21         | 6.31 | 7.50    | 5.99 | 6.52   | 5.38 | <0.001 |
| Poland                                        | 9.25         | 6.51 | 9.19    | 6.49 | 8.17   | 6.15 | 0,017  |
| Scotland                                      | 8.66         | 6.90 | 8.39    | 6.88 | 7.01   | 5.63 | 0.101  |
| Wales                                         | 8.77         | 6.88 | 9.10    | 6.94 | 8.88   | 7.60 | 0.011  |
| Index of somatic symptoms (SCL_S)             |              |      |         |      |        |      |        |
| Azerbaijan                                    | 2.91         | 3.70 | 2.27    | 3.33 | 3.41   | 4.70 | <0.001 |
| Czechia                                       | 2.72         | 2.75 | 2.64    | 2.73 | 2.43   | 2.51 | 0,045  |
| Denmark                                       | 2.92         | 3.03 | 3.23    | 3.23 | 2.68   | 2.91 | 0.001  |
| Germany                                       | 3.76         | 3.28 | 3.73    | 3.18 | 3.12   | 2.94 | <0.001 |
| Ireland                                       | 3.03         | 3.17 | 3.29    | 3.40 | 2.15   | 2.49 | 0.001  |
| Norway                                        | 3.07         | 3.21 | 2.72    | 2.91 | 2.27   | 2.64 | <0.001 |
| Poland                                        | 3.12         | 3.13 | 3.09    | 3.07 | 2.83   | 3.02 | 0.241  |
| Scotland                                      | 3.22         | 3.41 | 3.11    | 3.33 | 2.45   | 3.03 | 0,091  |
| Wales                                         | 3.33         | 3.36 | 3.40    | 3.39 | 3.66   | 3.80 | 0.316  |
| Index of psychological symptoms (SCL_P)       |              |      |         |      |        |      |        |
| Azerbaijan                                    | 3.96         | 4.31 | 3.06    | 3.97 | 3.44   | 4.75 | <0.001 |
| Czechia                                       | 5.79         | 3.92 | 5.56    | 3.88 | 4.94   | 3.70 | <0.001 |
| Denmark                                       | 5.04         | 3.77 | 5.22    | 3.96 | 4.45   | 3.43 | <0.001 |
| Germany                                       | 4.64         | 3.58 | 4.76    | 3.69 | 4.26   | 3.23 | 0.004  |
| Ireland                                       | 5.03         | 4.00 | 5.59    | 4.18 | 4.85   | 3.83 | <0.001 |
| Norway                                        | 5.09         | 3.80 | 4.75    | 3.74 | 4.20   | 3.40 | <0.001 |
| Poland                                        | 6.08         | 4.29 | 6.05    | 4.30 | 5.31   | 4.07 | 0.009  |
| Scotland                                      | 5.40         | 4.28 | 5.24    | 4.25 | 4.57   | 3.61 | 0.239  |
| Wales                                         | 5.40         | 4.32 | 5.65    | 4.37 | 5.19   | 4.58 | 0.001  |

\* Kruskal-Wallis test

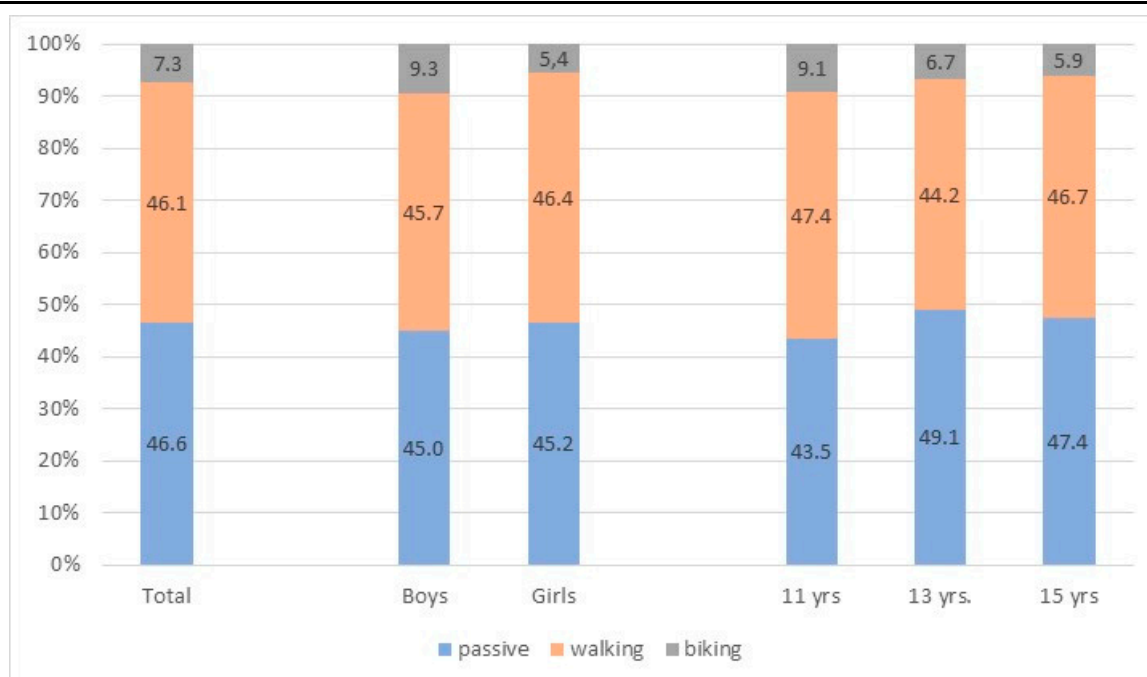

**Figure S1.** Mode of transport to school by age and gender.
